# Supplementary material
Source: PubMed Central journal article supplement (PMC3867822)
Supplement: NIHMS527783-supplement-supplement_1.pdf [file NIHMS527783-supplement-supplement_1.pdf]

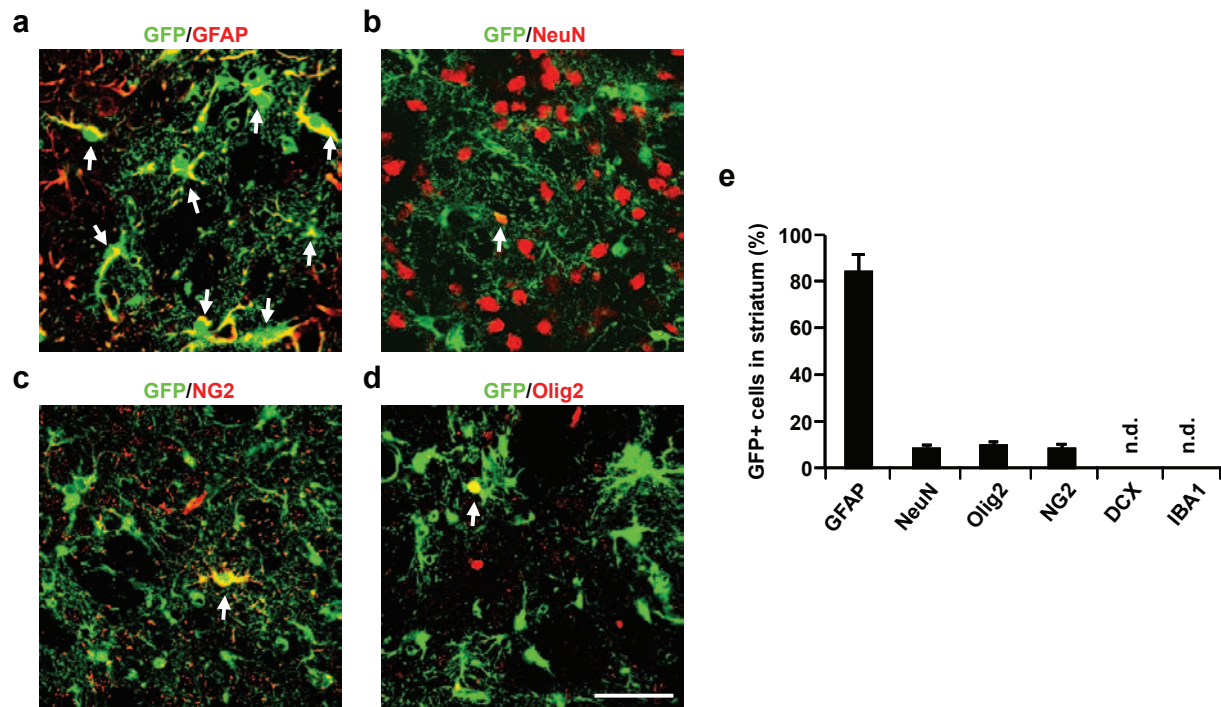

**Figure S1** The *hGFAP* promoter in lentivirus drives gene expression predominantly in astrocytes. **(a-d)** Immunohistological analyses of GFP-expressing cells in striatal regions injected with *hGFAP-GFP* lentivirus. Arrows indicate co-labeled cells with the indicated markers. Scale: 20  $\mu$ m.

**(e)** Quantification of marker expression in GFP+ cells. Data are presented as mean + s.d.. Mean is shown for  $n = 3$  animals, scoring for each animal 250 or more GFP+ cells from 3-6 brain sections for each marker. n.d., not detected.

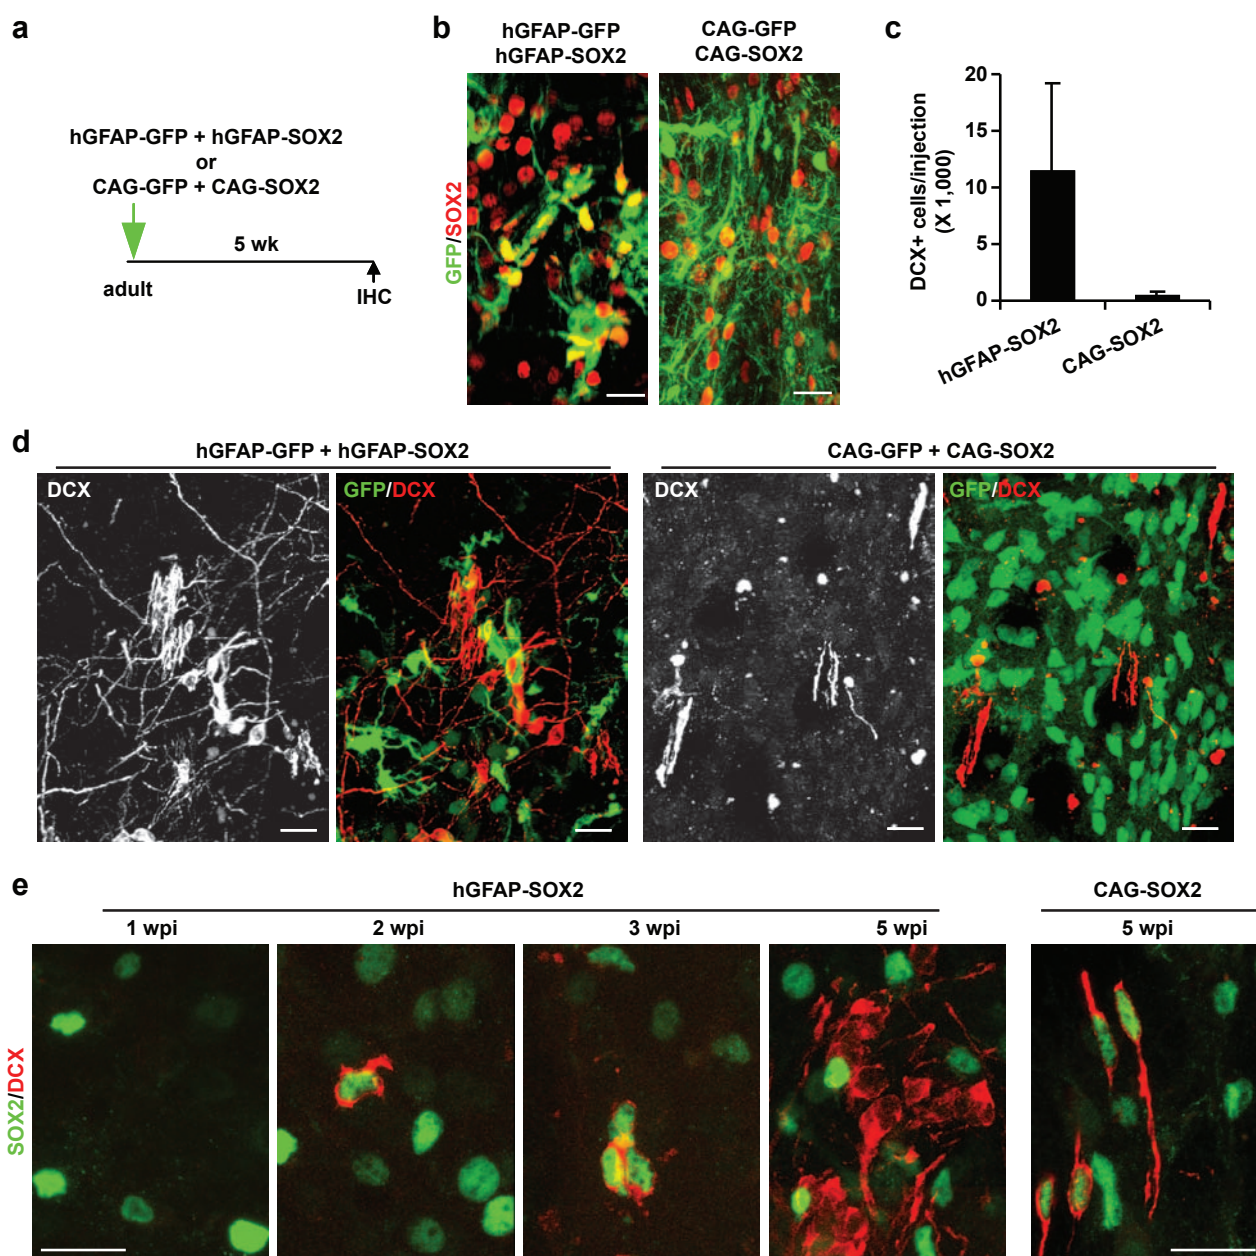

**Figure S2** Continually high expression of ectopic SOX2 prohibits robust induction of iANBs. **(a)** Experimental design. Adult mice were injected with the indicated lentivirus. Gene expression was mediated by an *hGFAP* promoter or a constitutively active *CAG* promoter. Mice were analyzed 5 weeks later. **(b)** SOX2 expression in lentivirus-injected mouse brains. **(c-d)** DCX<sup>+</sup> cells with extended neuronal processes are robustly detected in regions

injected with *hGFAP-SOX2* but not *CAG-SOX2* lentivirus. Data are presented as mean + s.d.,  $n = 4$  animals per group. **(e)** SOX2 expression in DCX<sup>+</sup> cells at the indicated weeks of post injection (wpi). The expression of SOX2 in DCX<sup>+</sup> cells is greatly reduced at later stages in mice injected with virus expressing *hGFAP-SOX2* but not *CAG-SOX2*. DCX<sup>+</sup> cells are rarely observed from 1-3 wpi. Scales: 20  $\mu$ m.

|        | $V_0$ (mV) | $R_{in}$ (M $\Omega$ ) |             |
|--------|------------|------------------------|-------------|
| Cell1  | -76.70     | 156.10                 |             |
| Cell2  | -77.70     | 525.00                 |             |
| Cell3  | -77.70     | 80.00                  |             |
| Cell4  | -77.00     | 30.10                  |             |
| Cell5  | -74.70     | 85.50                  |             |
| Cell6  | -80.50     | 33.30                  |             |
| Cell7  | -80.00     | 26.50                  |             |
| Cell8  | -81.30     | 42.00                  |             |
| Cell9  | -75.40     | 97.20                  |             |
| Cell10 | -23.30     | 1000.00                | ← microglia |
| Cell11 | -80.90     | 34.50                  |             |
| Cell12 | -81.80     | 22.30                  |             |
| Cell13 | -79.20     | 26.60                  |             |

**Figure S3** Whole cell patch clamp parameters of traced cells in the striatum of *Cst3-CreER<sup>T2</sup>;Rosa-tdT* mice. With the exception of one recorded cell has electrophysiological properties similar to microglia (indicated by an arrow), the remaining cells resemble astrocytes.  $V_0$ , resting membrane potential;  $R_{in}$ , input resistance.

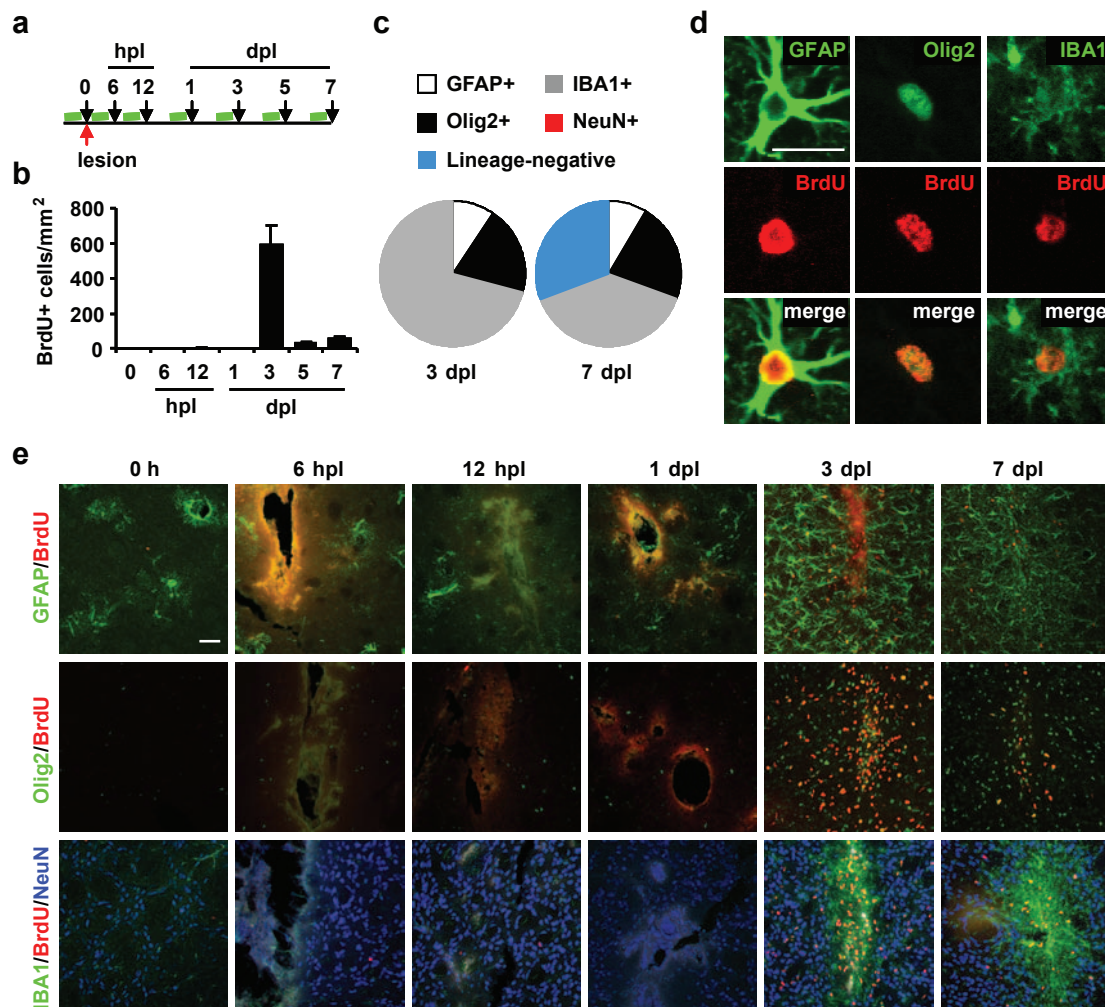

**Figure S4** Proliferating cells in the adult striatum pre- and post-lesions. **(a)** Experimental design. Proliferating cells were labeled by BrdU administered with three intraperitoneal injections over a 6 h period before sacrifice. Striatal lesions were stereotactically introduced by a 30-gauge needle. hpl, hr post lesion; dpl, days post lesion. **(b)** Quantification of BrdU+ cells within

the striatum. Very few proliferating cells were detected in the adult striatum before 3 dpl. Data are presented as mean + s.d.,  $n = 4$  lesion sites at each time point. **(c)** Distribution of proliferating cells among the examined cell types at 3 and 7 dpl. **(d-e)** Representative images showing labeled cells. Scales: 20  $\mu$ m **(d)** and 50  $\mu$ m **(e)**.

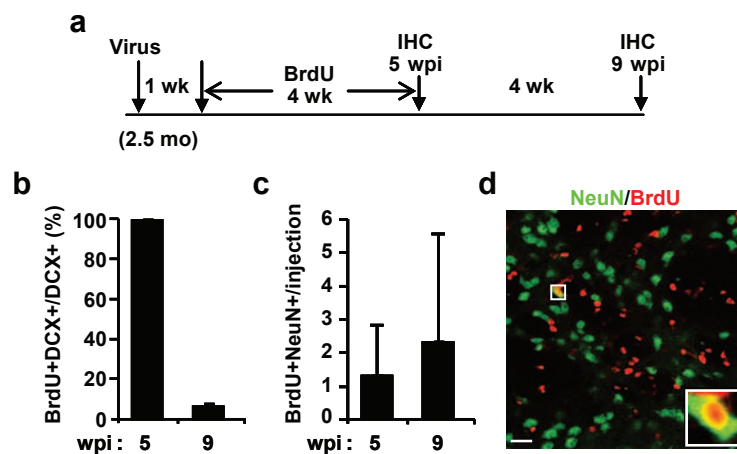

**Figure S5** iANBs rarely generate mature neurons under normal conditions. (a) Experimental design to examine newly generated mature neurons induced by SOX2. BrdU was administered in drinking water continuously for 4 weeks.

(b-c) Quantification of BrdU-labeled DCX<sup>+</sup> (b) or NeuN<sup>+</sup> (c) cells in infected striatal regions. Data are presented as mean + s.d., *n* = 3 animals per group. (d) Immunofluorescence analysis showing a single BrdU<sup>+</sup>NeuN<sup>+</sup> cell. Scale: 20 μm.

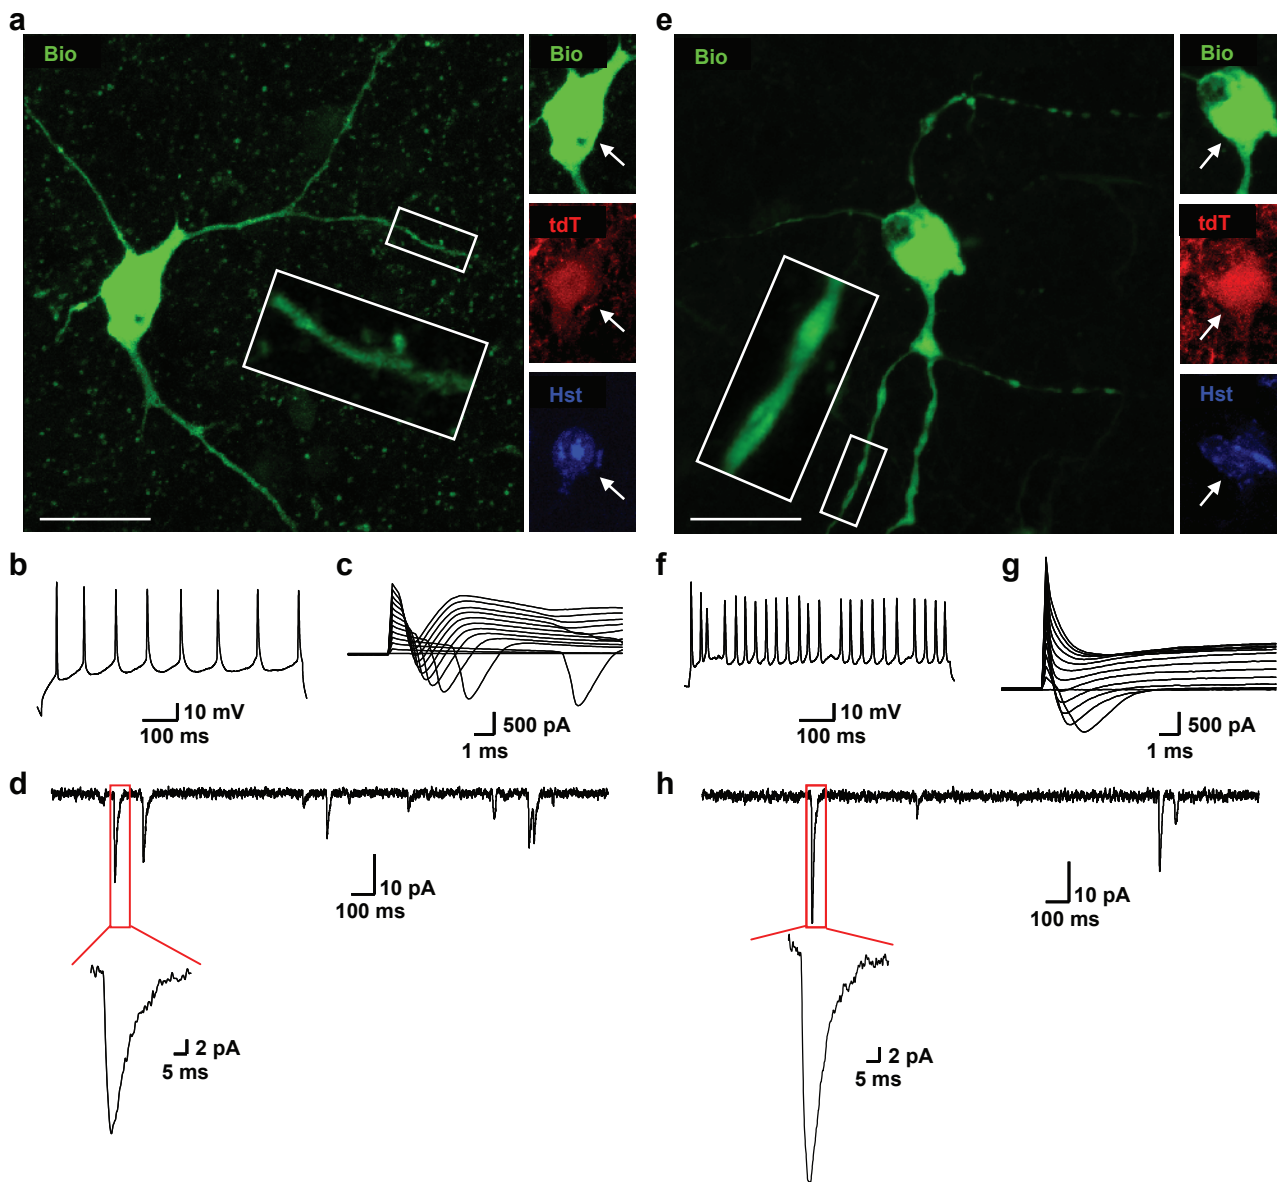

**Figure S6** Confocal images (**a** and **e**) and electrophysiological properties (**b-d** and **f-h**) of additional recorded  $tdT^+$  cells (indicated by arrows), which were loaded with biocytin (Bio) during recording. Enlarged views of the boxed regions show detailed dendritic morphology of the recorded cells. (**b-d**) Electrophysiology of an aspiny  $tdT^+$  cells labeled in panel (**a**). (**f-h**)

Electrophysiology of an aspiny  $tdT^+$  cells labeled in panel (**e**). These two cells fired repetitive action potentials in response to current step (**b, f**), exhibited inward currents in response to voltage step (**c, g**), and showed depolarizing spontaneous synaptic currents at resting membrane potential (**d, h**). Scales: 20  $\mu$ m.

SUPPLEMENTARY INFORMATION

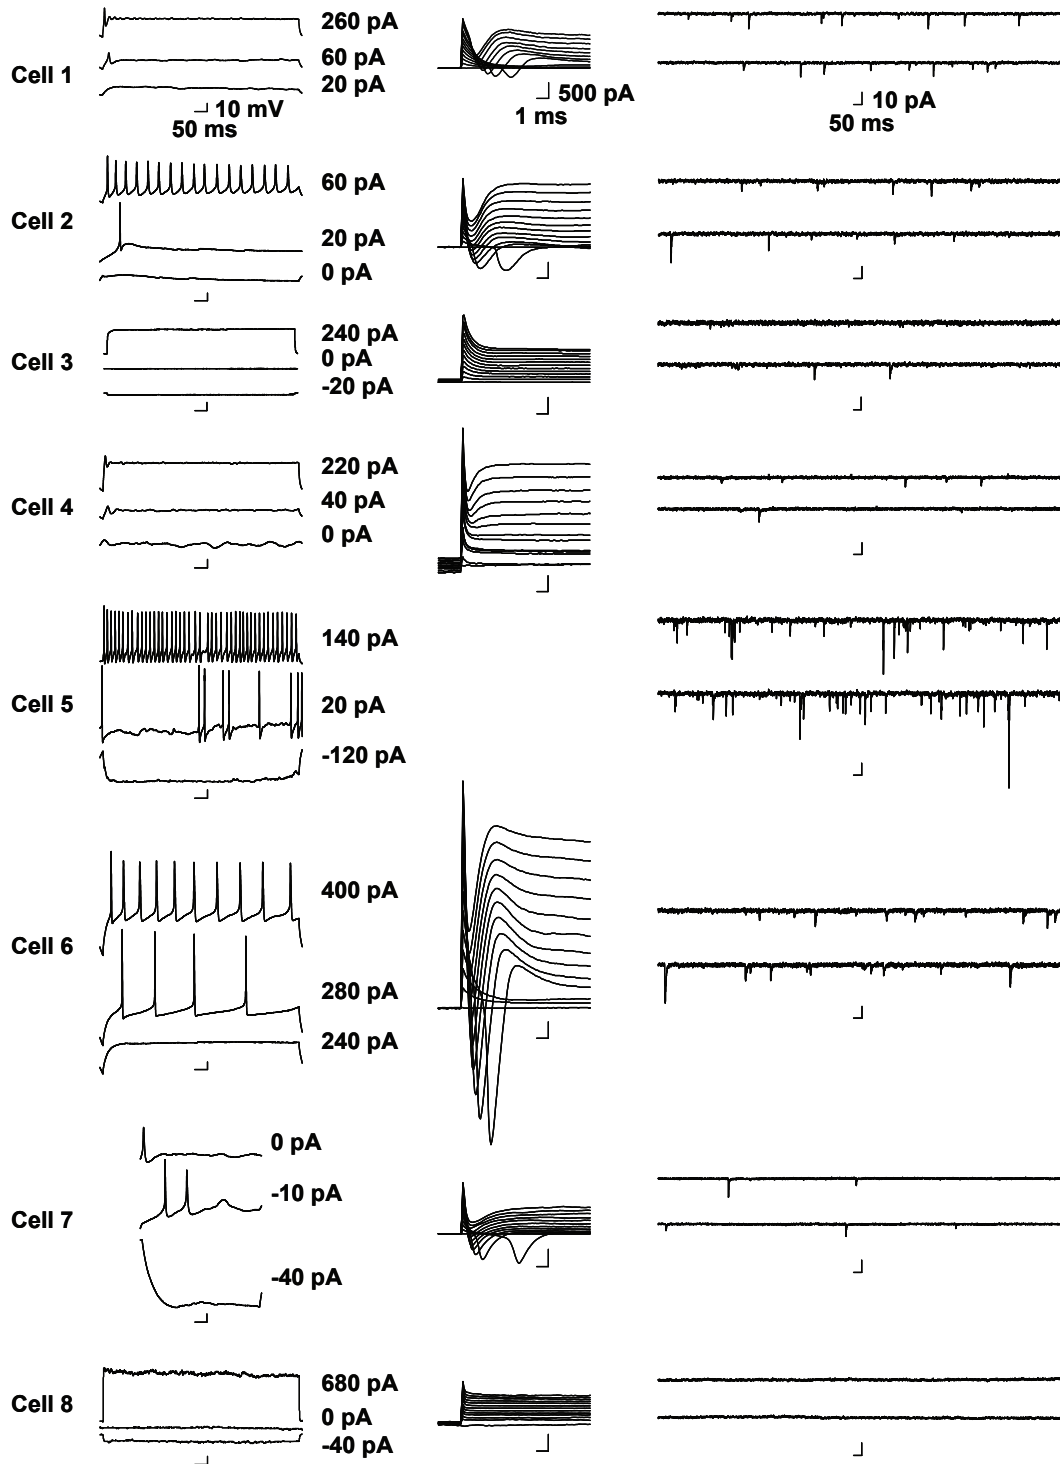

**Figure S7** Electrophysiological properties of SOX2-induced neurons. Action potentials (left panels), inward currents upon depolarization (middle panels), and spontaneous synaptic currents (right panels) are shown for all 18 reprogrammed cells, which were traced in *Cst3-CreERT2;Rosa-tdT* mice. The

three action potential traces shown were elicited by subthreshold current injection (bottom), just-suprathreshold depolarizing current injection (middle), and a more depolarizing current injection to generate the most frequent firing (top). The corresponding current injected was labeled besides the trace.

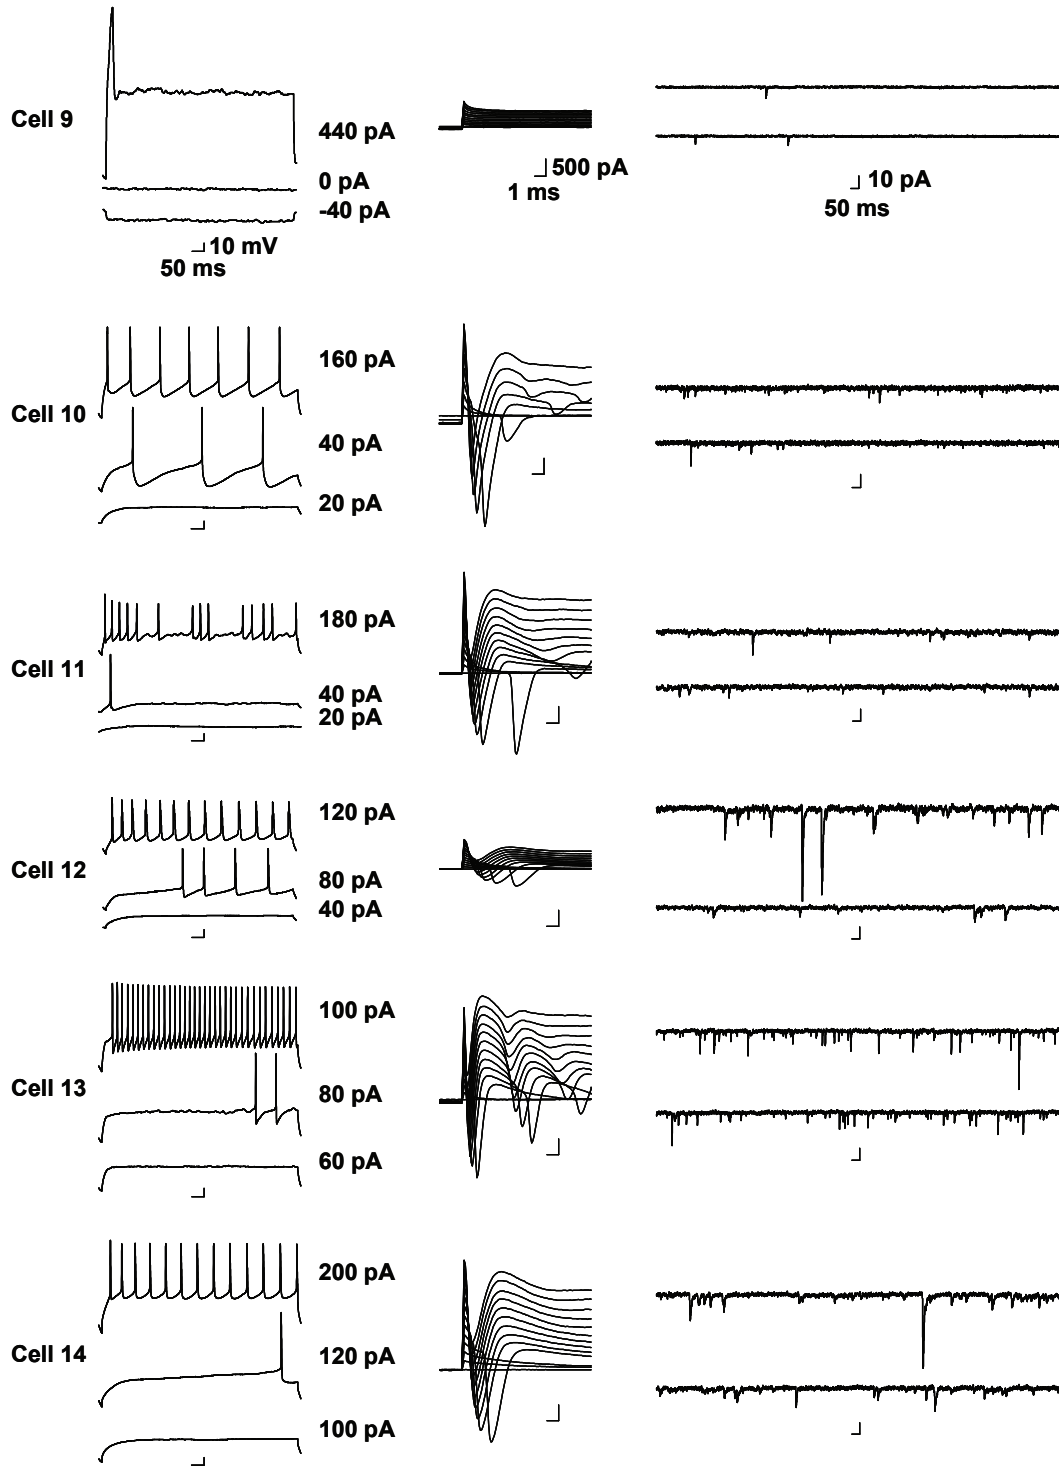

Figure S7 continued



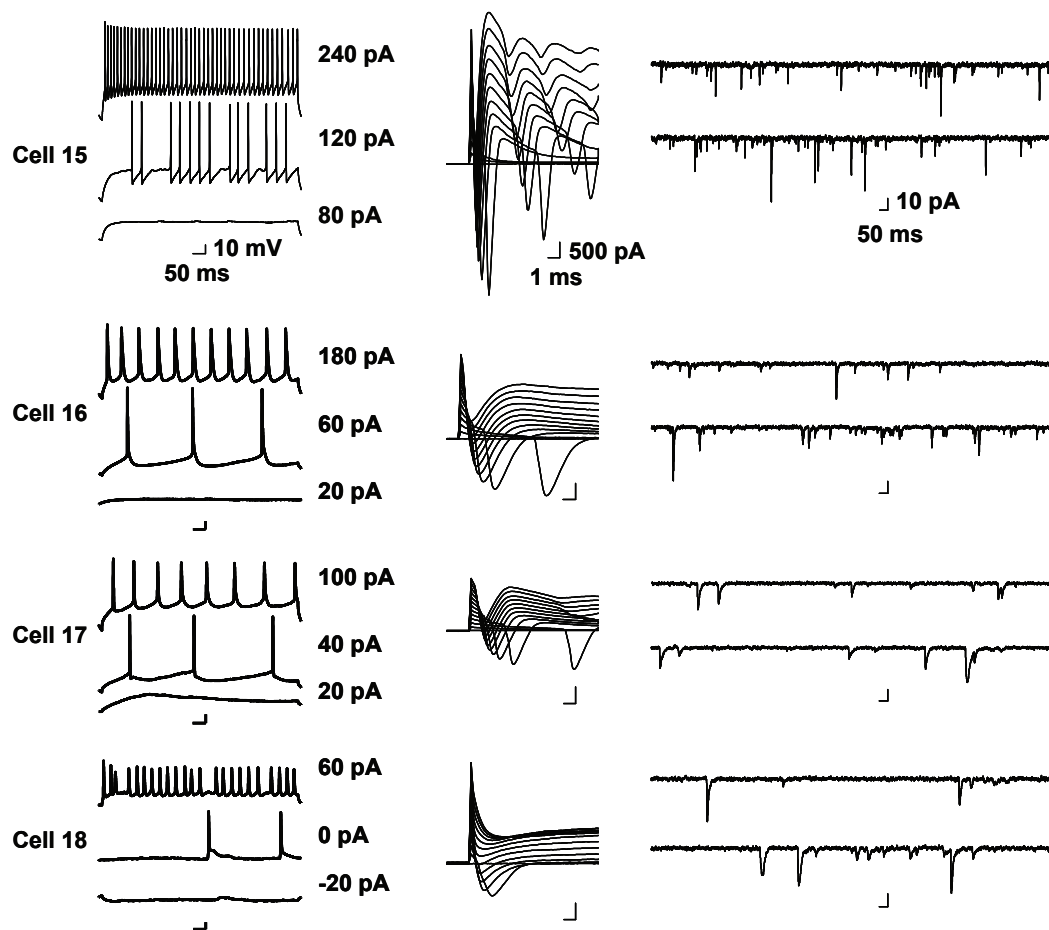

Figure S7 continued

|        | $V_0$ (mV) | $R_{in}$ (M $\Omega$ ) | C (pF) | AP freq (Hz) | AP threshold (mV) |
|--------|------------|------------------------|--------|--------------|-------------------|
| Cell2  | -70.00     | 443.00                 | 10.81  | 22.50        | -50               |
| Cell5  | -83.80     | 205.80                 | 18.15  | 12.50        | -41               |
| Cell6  | -76.10     | 192.50                 | 30.62  | 8.75         | -40               |
| Cell7  | -76.70     | 2114.00                | 8.99   | 16.00        | -35               |
| Cell10 | -73.40     | 205.80                 | 14.28  | 50.00        | -40               |
| Cell11 | -86.00     | 1319.00                | 12.31  | 16.25        | -38               |
| Cell12 | -70.00     | 560.70                 | 17.00  | 16.25        | -34               |
| Cell13 | -42.00     | 4000.00                | 5.72   | 6.00         | -40               |
| Cell14 | -55.80     | 1887.00                | 15.98  | 15.00        | -36               |
| Cell15 | -58.20     | 325.10                 | 12.31  | 53.75        | -32               |
| Cell16 | -46.20     | 298.20                 | 12.31  | 20.00        | -38               |
| Cell17 | -69.70     | 829.00                 | 14.28  | 10.00        | -37               |
| Cell18 | -77.70     | 525.00                 | 3.53   | 28.75        | -55               |

**Figure S8** Whole cell patch clamp parameters of SOX2-induced neurons with multiple action potentials.  $V_0$ , resting membrane potential;  $R_{in}$ , input resistance; C, capacitance; AP freq, frequency of action potentials.
